# Supplementary material for: The impact of extrusion on the nutritional composition, dietary fiber and in vitro digestibility of gluten-free snacks based on rice, pea and carob flour blends
Source: Royal Society of Chemistry journal article supplement (doi:10.1039/c7fo00910k), 2017-01-01
Supplement: c7fo00910k1.pdf [file c7fo00910k1.pdf]

### Complementary material about PCA.

**Figure S1.** Principal components analysis (PCA) projection of the three principal components. NE- (Non-extruded formulations), Ex- (Extruded formulations). Parameters: protein, soluble protein, protein digestibility. Fat, carbohydrates, total starch. Amylose, amylopectin, total dietary fibre (TDF), insoluble dietary fibre (IDF), soluble dietary fibre (SDF), ash, moisture, dry matter.

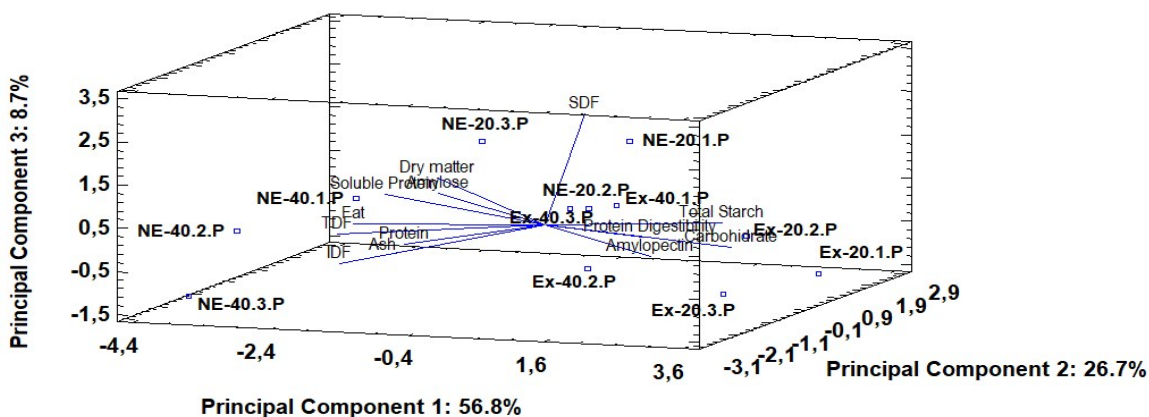

**Table of Compounds Weights in relation to PC1, PC2 and PC3**

|                       | <i>Principal Component</i> | <i>Principal Component</i> | <i>Principal Component</i> |
|-----------------------|----------------------------|----------------------------|----------------------------|
|                       | 1                          | 2                          | 3                          |
| Total Starch          | 0,194602                   | 0,402248                   | -0,171141                  |
| Amylose               | -0,300404                  | 0,262723                   | 0,0463701                  |
| Amylopectin           | 0,300411                   | -0,262788                  | -0,0461096                 |
| Protein               | -0,108111                  | -0,449375                  | 0,0767944                  |
| TDF                   | -0,300243                  | -0,274211                  | 0,0162384                  |
| IDF                   | -0,31614                   | -0,219139                  | -0,248625                  |
| SDF                   | 0,0778932                  | -0,00518652                | 0,912532                   |
| Soluble Protein       | -0,350645                  | 0,115499                   | 0,112554                   |
| Fat                   | -0,360183                  | -0,0235172                 | -0,0579057                 |
| Dry matter            | -0,303143                  | 0,260907                   | 0,165449                   |
| Ash                   | -0,138814                  | -0,475315                  | -0,00687278                |
| Protein Digestibility | 0,281536                   | -0,258864                  | 0,106891                   |
| Carbohydrate          | 0,361503                   | -0,00602335                | -0,104287                  |

**Table of Formulations Weights in relation to PC1, PC2 and PC3.**

|            | <i>Principal Component</i> | <i>Principal Component</i> | <i>Principal Component</i> |
|------------|----------------------------|----------------------------|----------------------------|
|            | 1                          | 2                          | 3                          |
| NE- 20.1.P | -0,0387954                 | 2,61058                    | 1,19859                    |
| NE- 20.2.P | -0,445574                  | 2,22112                    | -0,283962                  |
| NE- 20.3.P | -1,62238                   | 1,44549                    | 1,40746                    |
| NE- 40.1.P | -2,9596                    | 0,422732                   | 0,267783                   |
| NE- 40.2.P | -4,37492                   | -0,232058                  | -0,409491                  |
| NE- 40.3.P | -4,19095                   | -2,07885                   | -1,38297                   |
| Ex- 20.1.P | 3,17366                    | 1,66493                    | -1,34631                   |
| Ex- 20.2.P | 2,72443                    | 0,401774                   | -0,156387                  |
| Ex- 20.3.P | 2,49232                    | 0,214733                   | -1,46509                   |
| Ex- 40.1.P | 1,57259                    | -1,09919                   | 0,8956                     |
| Ex- 40.2.P | 1,82715                    | -2,49034                   | -0,144141                  |
| Ex- 40.3.P | 1,84206                    | -3,08092                   | 1,41891                    |
